# Supplementary material for: Functional, Antioxidant, and Anti-Inflammatory Properties of Cricket Protein Concentrate (Gryllus assimilis)
Source: MDPI journal article supplement (doi:10.3390/biology11050776), 2022-05-20
Supplement: s1 [file s1]

Cricket protein isolate (CPI) blue Coomassie

CPI photo of gel analyzer

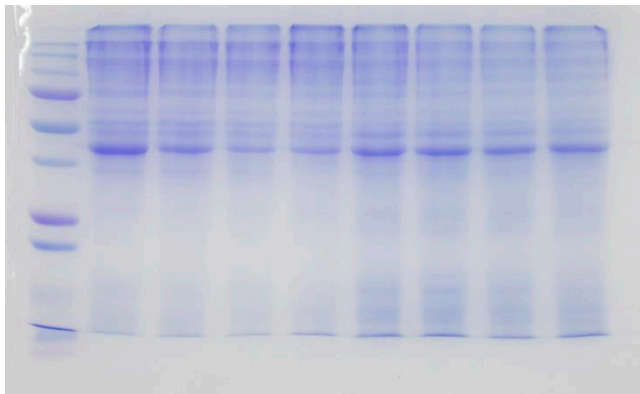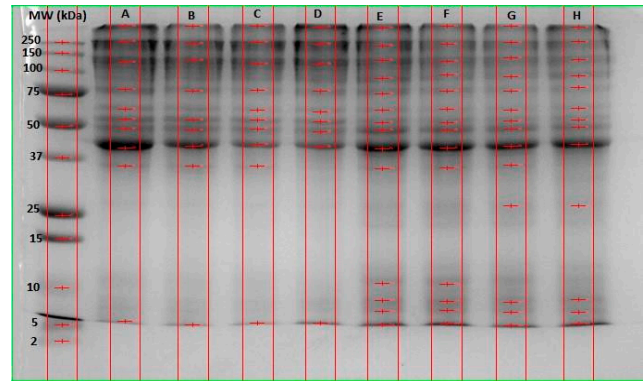

instrument

**Figure S1.** Cricket protein concentrate (CPC), the uncropped western blot figures were presented.

Gastric hydrolysate

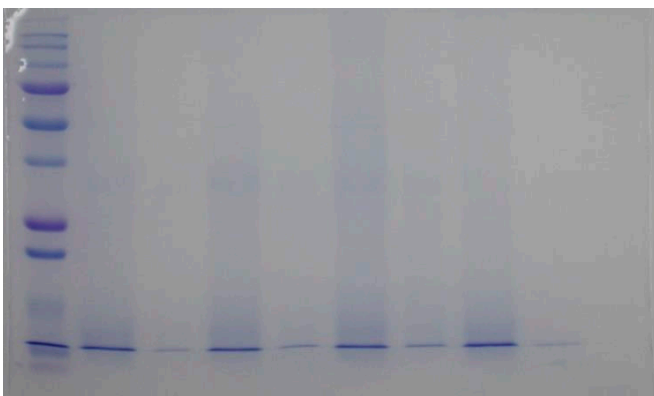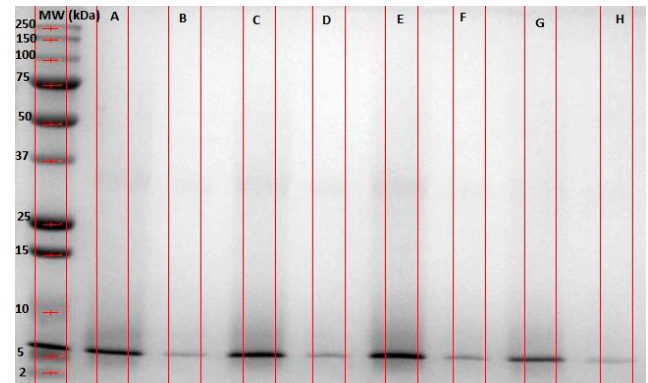

Duodenal hydrolysate

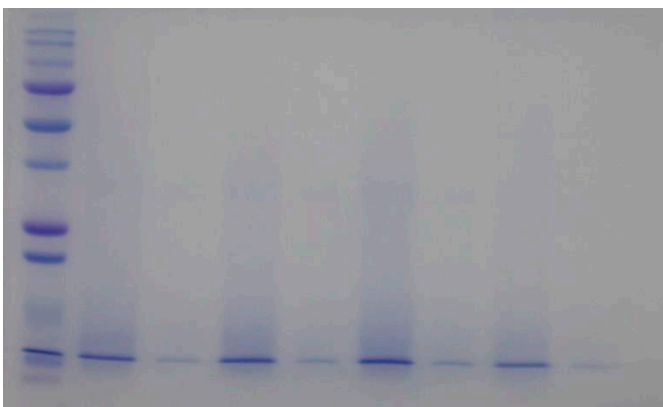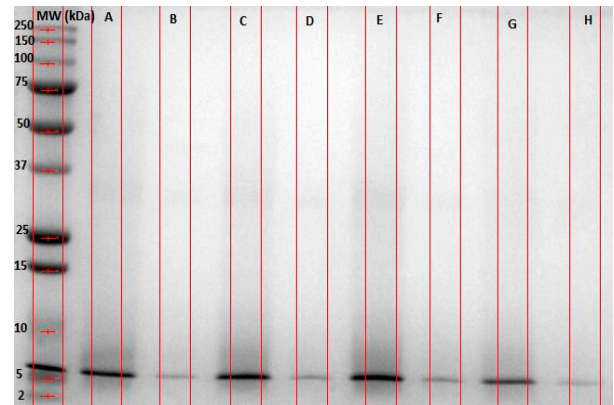

**Figure S2.** hydrolysates from cricket protein concentrate (CPC).
